# Supplementary material for: Synbiotic-driven improvement of metabolic disturbances is associated with changes in the gut microbiome in diet-induced obese mice
Source: PubMed Central journal article supplement — Mol Metab. 2019 Feb 5;22:96–109. doi: 10.1016/j.molmet.2019.01.012 (PMC6437638; doi:10.1016/j.molmet.2019.01.012), 2019-02-05
Supplement: mmc2.pdf [file mmc2.pdf]

**Table S3 Forty-five bile acids and four deuterium-labeled BAs**

| Trivial name                                                    | Abbreviation                                   | Supplier                   | Product number | Molecular weight (g/mol) | Found BAs in cecum |
|-----------------------------------------------------------------|------------------------------------------------|----------------------------|----------------|--------------------------|--------------------|
| Lithocholic acid                                                | LCEA                                           | Steraloids                 | C2700-000      | 374.56                   | x                  |
| 3-Ketocholanic acid                                             | DLCA                                           | Steraloids                 | C1750-000      | 374.56                   | x                  |
| Allolithocholic acid                                            | alloLCA                                        | Steraloids                 | C0700-000      | 376.57                   | x                  |
| Isolithocholic acid                                             | isoLCA                                         | Steraloids                 | C1475-000      | 376.57                   | x                  |
| Lithocholic acid                                                | LCA                                            | Sigma                      | L6250-10G      | 376.57                   | LCA                |
| 5 $\alpha$ -Cholanic Acid-3 $\alpha$ -ol-6-one                  | 5 $\alpha$ -Cholanic Acid-3 $\alpha$ -ol-6-one | Steraloids                 | C0720-000      | 390.56                   | x                  |
| 3 $\alpha$ -Hydroxy-7 Ketolithocholic Acid                      | 7-oxoLCA                                       | Steraloids                 | C1600-000      | 390.56                   | x                  |
| 3 $\alpha$ -Hydroxy-12 Ketolithocholic Acid                     | 12-oxoLCA                                      | Steraloids                 | C1650-000      | 390.56                   | x                  |
| 8(14),(5 $\beta$ )-Cholanic Acid-3 $\alpha$ , 12 $\alpha$ -diol | Apocholeic acid                                | Steraloids                 | C2500-000      | 390.56                   | x                  |
| 3-dehydrochenodeoxycholic acid                                  | 3-dehydroCDCA                                  | Steraloids                 | C1706-000      | 390.56                   | 3-dehydroCDCA      |
| Murideoxycholic acid                                            | MDCA                                           | Steraloids                 | C0910-000      | 392.57                   | MDCA               |
| Ursodeoxycholic acid                                            | UDCA                                           | Sigma                      | U5127-1G       | 392.57                   | UDCA               |
| Hyodeoxycholic acid                                             | HDCA                                           | Sigma                      | H3878-5G       | 392.57                   | HDCA               |
| Chenodeoxycholic acid                                           | CDCA                                           | Sigma                      | C9377-100MG    | 392.57                   | x                  |
| Deoxycholic acid                                                | DCA                                            | Sigma                      | D2510-10G      | 392.57                   | DCA                |
| Isodeoxycholic acid                                             | isoDCA                                         | Steraloids                 | C1170-000      | 392.57                   | x                  |
| d4-Deoxycholic acid                                             | d4-DCA                                         | CDN Isotopes               | D-2941         | 396.6                    | x                  |
| 7,12-Diketolithocholic acid                                     | 7,12DKLCA                                      | Steraloids                 | C1500-000      | 404.54                   | x                  |
| 6,7-Diketolithocholic acid                                      | 6,7DKLCA                                       | Steraloids                 | C1485-000      | 404.54                   | x                  |
| 7-oxodeoxycholic acid                                           | 7-oxoDCA                                       | Steraloids                 | C1250-000      | 406.56                   | 7-oxoDCA           |
| 3-oxodeoxycholic acid                                           | 3-oxoDCA                                       | Steraloids                 | C1272-000      | 406.56                   | x                  |
| Ursocholic acid                                                 | UCA                                            | Santa Cruz                 | sc-473896      | 408.57                   | x                  |
| $\omega$ -Muricholic acid                                       | $\omega$ MCA                                   | Steraloids                 | C1888-000      | 408.57                   | $\omega$ MCA       |
| $\alpha$ -Muricholic acid                                       | $\alpha$ MCA                                   | Steraloids                 | C1890-000      | 408.57                   | $\alpha$ MCA       |
| $\beta$ -Muricholic acid                                        | $\beta$ MCA                                    | Steraloids                 | C1895-000      | 408.57                   | $\beta$ MCA        |
| Hyocholeic acid                                                 | $\lambda$ MCA                                  | Steraloids                 | C1850-000      | 408.57                   | x                  |
| Allocholeic acid                                                | alloCA                                         | Santa Cruz                 | sc-210779      | 408.57                   | alloCA             |
| Cholic acid                                                     | CA                                             | Sigma                      | C1129-25G      | 408.57                   | CA                 |
| d4-Cholic acid                                                  | d4-CA                                          | Sigma                      | D-2452         | 412.6                    | x                  |
| Glycolithocholic acid sodium salt                               | GLCA                                           | Santa Cruz                 | sc-396741      | 455.61                   | x                  |
| Glycochenodeoxycholate, sodium salt                             | GCDCA                                          | Sigma                      | G0759-100MG    | 471.61                   | x                  |
| Glycohyodeoxycholic acid                                        | GHDCA                                          | Abcam                      | sc-396740      | 449.62                   | x                  |
| Glycoursodeoxycholic acid                                       | GUDCA                                          | Sigma                      | 06863-1G       | 449.62                   | x                  |
| Glycodeoxycholic acid, sodium salt                              | GDCA                                           | Calbiochem                 | 361311-5GM     | 471.6                    | x                  |
| Glycodeoxycholic-2,2,4,4-D4 acid                                | d4-GDCA                                        | Sigma                      | 739707-SPEC    | 453.65                   | x                  |
| Glycohyocholic acid, sodium salt                                | GHCA                                           | Steraloids                 | C1860-000      | 487.6                    | x                  |
| Glycocholic acid                                                | GCA                                            | Steraloids                 | C1925-000      | 465.62                   | x                  |
| Taurolithocholate, sodium salt                                  | TLCA                                           | Sigma                      | T7515-1G       | 505.69                   | x                  |
| Cholic acid 7-sulfate                                           | CA-7S                                          | Cayman/ Biomol             | Cay9002532-1   | 488.6                    | CA-7S              |
| Tauroursodeoxycholic acid, sodium salt                          | TUDCA                                          | Calbiochem                 | 580549-1GM     | 521.7                    | TUDCA              |
| Taurohyodeoxycholic acid                                        | THDCA                                          | Steraloids                 | C0892-000      | 521.69                   | THDCA              |
| Taurochenodeoxycholic acid                                      | TCDCA                                          | Sigma                      | T6260-100MG    | 521.69                   | TCDCA              |
| Taurodeoxycholic acid                                           | TDCA                                           | Steraloids                 | C1160-000      | 499.7                    | TDCA               |
| $\omega$ -Tauromuricholic acid, sodium salt                     | $\omega$ TMCA                                  | Steraloids                 | C1889-000      | 537.69                   | $\omega$ TMCA      |
| $\alpha$ -Tauromuricholic acid, sodium salt                     | $\alpha$ TMCA                                  | Steraloids                 | C1893-000      | 537.69                   | $\alpha$ TMCA      |
| $\beta$ -Tauromuricholic acid, sodium salt                      | $\beta$ TMCA                                   | Steraloids                 | C1899-000      | 537.69                   | $\beta$ TMCA       |
| Taurohyocholic acid, sodium salt                                | THyoCA                                         | Steraloids                 | C1887-000      | 537.69                   | x                  |
| Taurocholic acid                                                | TCA                                            | Steraloids                 | C1965-000      | 515.7                    | TCA                |
| Taurocholic Acid-d5, sodium Salt                                | d5-TCA                                         | Toronto research chemicals | NC0341860      | 542.72                   | x                  |
