# Supplementary material for: Synbiotic-driven improvement of metabolic disturbances is associated with changes in the gut microbiome in diet-induced obese mice
Source: PubMed Central journal article supplement — Mol Metab. 2019 Feb 5;22:96–109. doi: 10.1016/j.molmet.2019.01.012 (PMC6437638; doi:10.1016/j.molmet.2019.01.012), 2019-02-05
Supplement: mmc3.pdf [file mmc3.pdf]

**Table S4 Taxonomic annotations of identified fifty-two significant and important OTUs**

| Name     | Top-hit taxon            | Similarity (%) | Top-hit taxonomy                                                                             | Strain and sequence                                          |
|----------|--------------------------|----------------|----------------------------------------------------------------------------------------------|--------------------------------------------------------------|
| OTU_4    | AB606363_s               | 98.84          | Bacteria;Firmicutes;Clostridia;Clostridiales;Ruminococcaceae;Oscillibacter                   | Uncultured bacterium; partial sequence                       |
| OTU_2430 | AB606363_s               | 96.53          | Bacteria;Firmicutes;Clostridia;Clostridiales;Ruminococcaceae;Oscillibacter                   | Uncultured bacterium; partial sequence                       |
| OTU_2488 | AB606363_s               | 96.99          | Bacteria;Firmicutes;Clostridia;Clostridiales;Ruminococcaceae;Oscillibacter                   | Uncultured bacterium; partial sequence                       |
| OTU_53   | JQ084467_s               | 99.77          | Bacteria;Firmicutes;Clostridia;Clostridiales;Ruminococcaceae;Oscillibacter                   | Uncultured bacterium; partial sequence                       |
| OTU_15   | FJ881211_s               | 98.15          | Bacteria;Firmicutes;Clostridia;Clostridiales;Ruminococcaceae;Oscillibacter                   | Uncultured bacterium; partial sequence                       |
| OTU_356  | EU506196_s               | 99.07          | Bacteria;Firmicutes;Clostridia;Clostridiales;Ruminococcaceae;AB606282_g                      | Uncultured bacterium; partial sequence                       |
| OTU_25   | DQ815300_s               | 98.6           | Bacteria;Firmicutes;Clostridia;Clostridiales;Ruminococcaceae;AB606282_g                      | Uncultured bacterium; partial sequence                       |
| OTU_564  | EF603862_s               | 97             | Bacteria;Firmicutes;Clostridia;Clostridiales;Ruminococcaceae;Pseudoflavonifractor            | Uncultured bacterium; partial sequence                       |
| OTU_152  | EU509811_s               | 99.54          | Bacteria;Firmicutes;Clostridia;Clostridiales;Ruminococcaceae;Pseudoflavonifractor            | Uncultured bacterium; partial sequence                       |
| OTU_24   | JQ083832_s               | 99.08          | Bacteria;Firmicutes;Clostridia;Clostridiales;Ruminococcaceae;Pseudoflavonifractor            | Uncultured bacterium; partial sequence                       |
| OTU_1212 | KI535319_s               | 97             | Bacteria;Firmicutes;Clostridia;Clostridiales;Ruminococcaceae;Pseudoflavonifractor            | Uncultured bacterium; partial sequence                       |
| OTU_33   | KE159677_s               | 99.07          | Bacteria;Firmicutes;Clostridia;Clostridiales;Ruminococcaceae;Anaerotruncus                   | Uncultured bacterium; partial sequence                       |
| OTU_30   | AB606395_s               | 98.84          | Bacteria;Firmicutes;Clostridia;Clostridiales;Lachnospiraceae;EU006213_g                      | Uncultured bacterium; partial sequence                       |
| OTU_58   | EU507468_s               | 99.53          | Bacteria;Firmicutes;Clostridia;Clostridiales;Lachnospiraceae;Acetatifactor                   | Uncultured bacterium; partial sequence                       |
| OTU_40   | EU006478_s               | 98.61          | Bacteria;Firmicutes;Clostridia;Clostridiales;Lachnospiraceae;Acetatifactor                   | Uncultured bacterium; partial sequence                       |
| OTU_77   | EF098689_s               | 98.84          | Bacteria;Firmicutes;Clostridia;Clostridiales;Lachnospiraceae;JQ084490_g                      | Uncultured bacterium; partial sequence                       |
| OTU_1    | KE159600_s               | 99.07          | Bacteria;Firmicutes;Clostridia;Clostridiales;Lachnospiraceae;KE159600_g                      | Uncultured bacterium; partial sequence                       |
| OTU_6    | EU506257_s               | 99.07          | Bacteria;Firmicutes;Clostridia;Clostridiales;Lachnospiraceae;KE159600_g                      | Uncultured bacterium; partial sequence                       |
| OTU_27   | EF603866_s               | 98.85          | Bacteria;Firmicutes;Clostridia;Clostridiales;Lachnospiraceae;Clostridium_g7                  | Uncultured bacterium; partial sequence                       |
| OTU_26   | Alistipes timonensis     | 97.56          | Bacteria;Bacteroidetes;Bacteroidia;Bacteroidales;Rikenellaceae;Alistipes                     | Alistipes timonensis JC136; whole genome sequence            |
| OTU_2850 | Alistipes timonensis     | 95.11          | Bacteria;Bacteroidetes;Bacteroidia;Bacteroidales;Rikenellaceae;Alistipes                     | Alistipes timonensis JC136; whole genome sequence            |
| OTU_1682 | Alistipes timonensis     | 95.11          | Bacteria;Bacteroidetes;Bacteroidia;Bacteroidales;Rikenellaceae;Alistipes                     | Alistipes timonensis JC136; whole genome sequence            |
| OTU_20   | Alistipes inops          | 98.89          | Bacteria;Bacteroidetes;Bacteroidia;Bacteroidales;Rikenellaceae;Alistipes                     | Alistipes inops strain 627; whole genome sequence            |
| OTU_3    | EF603419_s               | 99.11          | Bacteria;Bacteroidetes;Bacteroidia;Bacteroidales;Rikenellaceae;Alistipes                     | Uncultured bacterium; partial sequence                       |
| OTU_2812 | EF603419_s               | 96.89          | Bacteria;Bacteroidetes;Bacteroidia;Bacteroidales;Rikenellaceae;Alistipes                     | Uncultured bacterium; partial sequence                       |
| OTU_12   | PAC000670_s              | 99.11          | Bacteria;Bacteroidetes;Bacteroidia;Bacteroidales;Rikenellaceae;Rikenella                     | Uncultured bacterium; partial sequence                       |
| OTU_23   | EU791148_s               | 98.89          | Bacteria;Bacteroidetes;Bacteroidia;Bacteroidales;Rikenellaceae;HM630235_g                    | Uncultured bacterium; partial sequence                       |
| OTU_18   | JQ085186_s               | 98.9           | Bacteria;Proteobacteria;Deltaproteobacteria;Desulfovibrionales;Desulfovibrionaceae;Bilophila | Uncultured bacterium; partial sequence                       |
| OTU_29   | EF406368_s               | 99.11          | Bacteria;Bacteroidetes;Bacteroidia;Bacteroidales;S24-7_f;HM124247_g                          | Uncultured bacterium; partial sequence                       |
| OTU_44   | GQ157662_s               | 99.33          | Bacteria;Bacteroidetes;Bacteroidia;Bacteroidales;S24-7_f;Muribaculum                         | Uncultured bacterium; partial sequence                       |
| OTU_2    | AB626927_s               | 98             | Bacteria;Bacteroidetes;Bacteroidia;Bacteroidales;S24-7_f;AB626927_g                          | Uncultured bacterium; partial sequence                       |
| OTU_3035 | AB626927_s               | 95.78          | Bacteria;Bacteroidetes;Bacteroidia;Bacteroidales;S24-7_f;AB626927_g                          | Uncultured bacterium; partial sequence                       |
| OTU_32   | Bacteroides vulgatus     | 98.67          | Bacteria;Bacteroidetes;Bacteroidia;Bacteroidales;Bacteroidaceae;Bacteroides                  | Bacteroides vulgatus ATCC 8482; whole genome sequence        |
| OTU_2325 | Bacteroides vulgatus     | 97.33          | Bacteria;Bacteroidetes;Bacteroidia;Bacteroidales;Bacteroidaceae;Bacteroides                  | Bacteroides vulgatus ATCC 8483; whole genome sequence        |
| OTU_875  | Bacteroides vulgatus     | 97.33          | Bacteria;Bacteroidetes;Bacteroidia;Bacteroidales;Bacteroidaceae;Bacteroides                  | Bacteroides vulgatus ATCC 8484; whole genome sequence        |
| OTU_2583 | Bacteroides dorei        | 96.89          | Bacteria;Bacteroidetes;Bacteroidia;Bacteroidales;Bacteroidaceae;Bacteroides                  | Bacteroides dorei DSM 17855; whole genome sequence           |
| OTU_922  | Bacteroides oleiciplenus | 97.56          | Bacteria;Bacteroidetes;Bacteroidia;Bacteroidales;Bacteroidaceae;Bacteroides                  | Bacteroides oleiciplenus YIT 12058; whole genome sequence    |
| OTU_96   | GQ867375_s               | 92.48          | Bacteria;Bacteroidetes;Bacteroidia;Bacteroidales;Prevotellaceae;Alloprevotella               | Uncultured bacterium; partial sequence                       |
| OTU_48   | Alistipes putredinis     | 96             | Bacteria;Bacteroidetes;Bacteroidia;Bacteroidales;Rikenellaceae;Alistipes                     | Alistipes putredinis DSM 17216; whole genome sequence        |
| OTU_61   | DQ815748_s               | 97.56          | Bacteria;Bacteroidetes;Bacteroidia;Bacteroidales;Rikenellaceae;Alistipes                     | Uncultured bacterium; partial sequence                       |
| OTU_5    | HM124297_s               | 97.67          | Bacteria;Firmicutes;Clostridia;Clostridiales;Lachnospiraceae;Acetatifactor                   | Uncultured bacterium; partial sequence                       |
| OTU_45   | AB606330_s               | 99.07          | Bacteria;Firmicutes;Clostridia;Clostridiales;Lachnospiraceae;KE159538_g                      | Uncultured bacterium; partial sequence                       |
| OTU_98   | EU511963_s               | 99.11          | Bacteria;Firmicutes;Clostridia;Clostridiales;Lachnospiraceae;AY994025_g                      | Uncultured bacterium; partial sequence                       |
| OTU_84   | EU457259_s               | 99.07          | Bacteria;Firmicutes;Clostridia;Clostridiales;Lachnospiraceae;Eisenbergiella                  | Uncultured bacterium; partial sequence                       |
| OTU_41   | KE159810_s               | 99.53          | Bacteria;Firmicutes;Clostridia;Clostridiales;Lachnospiraceae;KE159810_g                      | Uncultured bacterium; partial sequence                       |
| OTU_67   | Faecalibaculum rodentium | 99.56          | Bacteria;Firmicutes;Erysipelotrichi;Erysipelotrichales;Erysipelotrichaceae;Faecalibaculum    | Faecalibaculum rodentium strain A1017; whole genome sequence |
| OTU_110  | EF603857_s               | 99.56          | Bacteria;Firmicutes;Erysipelotrichi;Erysipelotrichales;Erysipelotrichaceae;ASTB_g            | Uncultured bacterium; partial sequence                       |
| OTU_125  | FJ676605_s               | 94.95          | Bacteria;Tenericutes;Mollicutes;Acholeplasmatales;Acholeplasmataceae;Acholeplasma_g2         | Uncultured bacterium; partial sequence                       |
| OTU_7    | PAC000701_s              | 99.11          | Bacteria;Bacteroidetes;Bacteroidia;Bacteroidales;Odoribacteraceae;Odoribacter                | Uncultured bacterium; partial sequence                       |
| OTU_38   | FJ879254_s               | 98.67          | Bacteria;Bacteroidetes;Bacteroidia;Bacteroidales;Porphyromonadaceae;Parabacteroides          | Uncultured bacterium; partial sequence                       |
| OTU_42   | DQ905725_s               | 98.6           | Bacteria;Firmicutes;Clostridia;Clostridiales;Lachnospiraceae;Eubacterium_g4                  | Uncultured bacterium; partial sequence                       |
| OTU_43   | AB606259_s               | 97.93          | Bacteria;Firmicutes;Clostridia;Clostridiales;Christensenellaceae;GQ422712_g                  | Uncultured bacterium; partial sequence                       |
