# Supplementary material for: Synbiotic-driven improvement of metabolic disturbances is associated with changes in the gut microbiome in diet-induced obese mice
Source: PubMed Central journal article supplement — Mol Metab. 2019 Feb 5;22:96–109. doi: 10.1016/j.molmet.2019.01.012 (PMC6437638; doi:10.1016/j.molmet.2019.01.012), 2019-02-05
Supplement: mmc4.pdf [file mmc4.pdf]

**Table S5 The average relative numbers of forty-two significant KEGG pathways**

| KEGG Pathway                                    | KEGG Sub Functional Role                    | ND       | HFD      | PRO      | PRE      | SYN      | Kruskal-Wallis P value |
|-------------------------------------------------|---------------------------------------------|----------|----------|----------|----------|----------|------------------------|
| Glycolysis_Gluconeogenesis                      | Carbohydrate metabolism                     | 11.50618 | 13.11614 | 11.60554 | 11.77534 | 11.68909 | 0.0141                 |
| Ribosome                                        | Translation                                 | 30.23902 | 23.93933 | 21.79374 | 23.95252 | 30.85984 | 0.0179                 |
| Cysteine_and_methionine_metabolism              | Amino acid metabolism                       | 1.669289 | 1.922466 | 1.899717 | 1.702992 | 1.376838 | 0.0337                 |
| Benzoate_degradation                            | Xenobiotics biodegradation and metabolism   | 1.073374 | 1.659983 | 1.458678 | 1.758214 | 1.530708 | 0.0056                 |
| Flagellar_assembly                              | Cell motility                               | 1.116992 | 1.478511 | 1.80721  | 2.253162 | 2.182892 | 0.0031                 |
| Bacterial_motility_proteins                     | Cell motility                               | 1.6224   | 2.051143 | 2.427224 | 2.795109 | 2.887449 | 0.0072                 |
| Two_component_system                            | Signal transduction                         | 3.074881 | 3.63281  | 3.937243 | 4.494268 | 4.692397 | 0.0096                 |
| Oxidative_phosphorylation                       | Energy metabolism                           | 1.737376 | 1.448861 | 1.587484 | 1.67909  | 2.054808 | 0.0126                 |
| Pyrimidine_metabolism                           | Nucleotide metabolism                       | 2.071057 | 1.359397 | 1.503    | 1.590641 | 1.65583  | 0.0348                 |
| Amino_acid_related_enzymes                      | Amino acid metabolism                       | 2.844785 | 2.410009 | 2.458488 | 2.160921 | 2.009236 | 0.0228                 |
| Transfer_RNA_biogenesis                         | Translation                                 | 2.061676 | 1.25343  | 1.314273 | 1.283195 | 1.289826 | 0.0249                 |
| Propanoate_metabolism                           | Carbohydrate metabolism                     | 2.495852 | 2.659991 | 2.534162 | 3.106768 | 2.86849  | 0.0525                 |
| Carbohydrate_metabolism                         | Carbohydrate metabolism                     | 0.299186 | 0.65379  | 0.538821 | 0.422158 | 0.280747 | 0.005                  |
| Sulfur_metabolism                               | Energy metabolism                           | 0.48129  | 0.762509 | 0.740573 | 0.731075 | 0.762775 | 0.0485                 |
| Fatty_acid_degradation                          | Lipid metabolism                            | 0.841783 | 1.176251 | 0.950905 | 1.233181 | 1.166711 | 0.0128                 |
| Synthesis_and_degradation_of_ketone_bodies      | Lipid metabolism                            | 0.539537 | 0.784996 | 0.533144 | 0.897008 | 0.791504 | 0.0259                 |
| Amino_acid_metabolism                           | Amino acid metabolism                       | 0.414005 | 0.582303 | 0.449759 | 0.6655   | 0.685754 | 0.013                  |
| Lysine_biosynthesis                             | Amino acid metabolism                       | 0.517969 | 0.811734 | 0.903961 | 0.716844 | 0.545721 | 0.0133                 |
| Lysine_degradation                              | Amino acid metabolism                       | 0.765566 | 1.092565 | 0.70255  | 1.194927 | 1.153402 | 0.024                  |
| Tryptophan_metabolism                           | Amino acid metabolism                       | 0.624925 | 0.94924  | 0.615834 | 1.009432 | 0.952519 | 0.0119                 |
| Valine_leucine_and_isoleucine_degradation       | Amino acid metabolism                       | 0.971127 | 1.169384 | 0.986768 | 1.250593 | 1.056844 | 0.029                  |
| Pantothenate_and_CoA_biosynthesis               | Metabolism of cofactors and vitamins        | 0.836756 | 1.131396 | 1.422997 | 1.000363 | 0.883976 | 0.0441                 |
| Terpenoid_backbone_biosynthesis                 | Metabolism of terpenoids and polyketides    | 0.548351 | 0.784996 | 0.542795 | 0.897008 | 0.809906 | 0.0241                 |
| Monobactam_biosynthesis                         | Biosynthesis of other secondary metabolites | 0.285497 | 0.642379 | 0.675849 | 0.485304 | 0.338511 | 0.0142                 |
| Nitrotoluene_degradation                        | Xenobiotics biodegradation and metabolism   | 0.507992 | 0.880847 | 0.74014  | 0.838839 | 0.719214 | 0.0256                 |
| D_Alanine_metabolism                            | Metabolism of other amino acids             | 0.101807 | 0        | 0.019301 | 0.008158 | 0.024489 | 0.0098                 |
| Peptidoglycan_biosynthesis                      | Glycan biosynthesis and metabolism          | 0.189264 | 0.05904  | 0.048153 | 0        | 0.034598 | 0.0061                 |
| Streptomycin_biosynthesis                       | Biosynthesis of other secondary metabolites | 0.625076 | 0.391759 | 0.359127 | 0.362171 | 0.440979 | 0.0047                 |
| RNA_polymerase                                  | Transcription                               | 0.887138 | 0.563611 | 0.461208 | 0.503377 | 0.72157  | 0.0232                 |
| Transcription_machinery                         | Transcription                               | 1.150629 | 0.716746 | 0.590695 | 0.603092 | 0.861459 | 0.0069                 |
| Aminoacyl_tRNA_biosynthesis                     | Translation                                 | 1.827155 | 0.982305 | 1.040982 | 0.890822 | 0.926251 | 0.0098                 |
| Ribosome_biogenesis                             | Translation                                 | 0.403462 | 0.094699 | 0.096013 | 0.092568 | 0.107576 | 0.0259                 |
| DNA_repair_and_recombination_proteins           | Replication and repair                      | 1.520739 | 1.043227 | 0.775965 | 0.9213   | 1.325709 | 0.0004                 |
| Protein_export                                  | Folding, sorting and degradation            | 0.232911 | 0.17835  | 0.119099 | 0.194566 | 0.103019 | 0.0453                 |
| Protein_folding_and_associated_processing       | Genetic information processing              | 0.498842 | 0.199919 | 0.301504 | 0.18623  | 0.281776 | 0.0117                 |
| Bacterial_secretion_system                      | Membrane transport                          | 0.232911 | 0.17835  | 0.119099 | 0.194566 | 0.103019 | 0.0453                 |
| Secretion_system                                | Membrane transport                          | 0.310633 | 0.247568 | 0.203793 | 0.398794 | 0.173074 | 0.009                  |
| Prokaryotic_Defense_System                      | Transport and catabolism                    | 0.269918 | 0.118584 | 0.084895 | 0.098532 | 0.17173  | 0.0123                 |
| Cell_cycle_Caulobacter                          | Cell growth and death                       | 0.249051 | 0.028298 | 0.058005 | 0.037991 | 0.05907  | 0.0051                 |
| Antimicrobial_resistance_genes                  | Drug resistance                             | 0.055684 | 0.008098 | 0.009651 | 0        | 0.024489 | 0.0345                 |
| Cationic_antimicrobial_peptide_CAMP_resistance  | Drug resistance                             | 0.118753 | 0.008098 | 0.009651 | 0        | 0.016387 | 0.0053                 |
| Membrane_and_intracellular_structural_molecules | Cellular processes and signaling            | 0.158025 | 0.069376 | 0.069984 | 0.09497  | 0.07407  | 0.0446                 |
