# Supplementary material for: Synbiotic-driven improvement of metabolic disturbances is associated with changes in the gut microbiome in diet-induced obese mice
Source: PubMed Central journal article supplement — Mol Metab. 2019 Feb 5;22:96–109. doi: 10.1016/j.molmet.2019.01.012 (PMC6437638; doi:10.1016/j.molmet.2019.01.012), 2019-02-05
Supplement: mmc5.pdf [file mmc5.pdf]

**Table S6a The correlation statistics between OTUs and host metabolic parameters**

| Variable1 | Variable2             | Correlation | P value  | Support | Corrected_pvalue |
|-----------|-----------------------|-------------|----------|---------|------------------|
| OTU_2430  | Cholesterol           | 0.570349    | 0.000122 | 40      | 0.0018           |
| OTU_53    | Cholesterol           | 0.564928    | 0.000146 | 40      | 0.0018           |
| OTU_53    | eAT.MCP.1.mRNA        | 0.519706    | 0.000589 | 40      | 0.004            |
| OTU_53    | eAT.adipocyte.size    | 0.540055    | 0.000322 | 40      | 0.0026           |
| OTU_356   | eAT.CD11c.mRNA        | 0.518185    | 0.000615 | 40      | 0.004            |
| OTU_356   | eAT.MCP.1.mRNA        | 0.573966    | 0.000108 | 40      | 0.0017           |
| OTU_356   | eAT.adipocyte.size    | 0.516691    | 0.000642 | 40      | 0.0041           |
| OTU_564   | Cholesterol           | 0.500373    | 0.001009 | 40      | 0.0053           |
| OTU_564   | eAT.CD11c.mRNA        | 0.565681    | 0.000175 | 39      | 0.0019           |
| OTU_564   | eAT.adipocyte.size    | 0.513748    | 0.000822 | 39      | 0.0046           |
| OTU_30    | eAT.CD11c.mRNA        | 0.528507    | 0.000543 | 39      | 0.0038           |
| OTU_30    | eAT.adipocyte.size    | 0.502777    | 0.001106 | 39      | 0.0056           |
| OTU_58    | Cholesterol           | 0.604627    | 0.000194 | 33      | 0.002            |
| OTU_58    | eAT.MCP.1.mRNA        | 0.573073    | 0.000753 | 31      | 0.0044           |
| OTU_26    | Fasting.insulin       | 0.57999     | 0.000135 | 38      | 0.0018           |
| OTU_26    | HOMA.IR               | 0.579073    | 0.00014  | 38      | 0.0018           |
| OTU_26    | Serum.LBP             | 0.567072    | 0.000311 | 36      | 0.0026           |
| OTU_26    | eAT.CD11c.mRNA        | 0.55874     | 0.000486 | 35      | 0.0035           |
| OTU_2850  | Serum.LBP             | 0.719498    | 0.003722 | 14      | 0.013            |
| OTU_2850  | Cholesterol           | 0.722604    | 0.005268 | 13      | 0.016            |
| OTU_2850  | Liver.TNF.a.mRNA      | 0.617444    | 0.024547 | 13      | 0.0442           |
| OTU_2850  | eAT.TNF.a.mRNA        | 0.599102    | 0.030484 | 13      | 0.0536           |
| OTU_2850  | eAT.CD11c.mRNA        | 0.806289    | 0.000871 | 13      | 0.0048           |
| OTU_2850  | eAT.MCP.1.mRNA        | 0.726912    | 0.004878 | 13      | 0.0156           |
| OTU_2850  | eAT.adipocyte.size    | 0.672447    | 0.033142 | 10      | 0.0579           |
| OTU_1682  | Serum.LBP             | 0.665447    | 0.009394 | 14      | 0.0223           |
| OTU_1682  | Liver.TNF.a.mRNA      | 0.728663    | 0.003117 | 14      | 0.0117           |
| OTU_1682  | Jejunum.TNF.a.mRNA    | 0.540665    | 0.045909 | 14      | 0.0758           |
| OTU_1682  | eAT.TNF.a.mRNA        | 0.721615    | 0.003574 | 14      | 0.0128           |
| OTU_1682  | eAT.CD11c.mRNA        | 0.694161    | 0.005881 | 14      | 0.0164           |
| OTU_1682  | eAT.MCP.1.mRNA        | 0.755491    | 0.001779 | 14      | 0.0078           |
| OTU_1682  | eAT.adipocyte.size    | 0.793886    | 0.006106 | 10      | 0.0167           |
| OTU_20    | Cholesterol           | 0.513162    | 0.000709 | 40      | 0.0043           |
| OTU_44    | Liver.TNF.a.mRNA      | -0.59191    | 0.000719 | 29      | 0.0043           |
| OTU_2     | eAT.TNF.a.mRNA        | -0.63621    | 0.001933 | 21      | 0.0084           |
| OTU_2     | eAT.weight            | -0.51031    | 0.002412 | 33      | 0.0097           |
| OTU_3035  | Fasting.blood.glucose | -0.60266    | 0.006314 | 19      | 0.0171           |
| OTU_3035  | eAT.TNF.a.mRNA        | -0.79505    | 0.000677 | 14      | 0.0042           |
| OTU_3035  | eAT.MCP.1.mRNA        | -0.70197    | 0.005132 | 14      | 0.0159           |
| OTU_3035  | eAT.weight            | -0.53662    | 0.014712 | 20      | 0.0306           |
| OTU_48    | Liver.TNF.a.mRNA      | -0.56465    | 0.000222 | 38      | 0.0022           |
| OTU_48    | eAT.adipocyte.size    | -0.57135    | 0.000145 | 39      | 0.0018           |
| OTU_45    | Serum.LBP             | -0.51722    | 0.002434 | 32      | 0.0097           |
| OTU_45    | Cholesterol           | -0.59229    | 0.000178 | 35      | 0.0019           |
| OTU_45    | Liver.TNF.a.mRNA      | -0.53923    | 0.000999 | 34      | 0.0053           |
| OTU_45    | eAT.CD11c.mRNA        | -0.50578    | 0.002277 | 34      | 0.0096           |
| OTU_98    | eAT.adipocyte.size    | -0.54768    | 0.000372 | 38      | 0.0028           |
| OTU_84    | Liver.TNF.a.mRNA      | -0.52257    | 0.000764 | 38      | 0.0044           |
| OTU_84    | Liver.LBP.mRNA        | -0.50956    | 0.001085 | 38      | 0.0056           |
| OTU_84    | eAT.adipocyte.size    | -0.56263    | 0.000236 | 38      | 0.0022           |
| OTU_67    | eAT.MCP.1.mRNA        | -0.56852    | 0.000242 | 37      | 0.0022           |
| OTU_110   | Fasting.blood.glucose | -0.55853    | 0.000327 | 37      | 0.0026           |
| OTU_110   | AUC.of.OGTT           | -0.51271    | 0.001176 | 37      | 0.0058           |
| OTU_110   | eAT.CD11c.mRNA        | -0.58897    | 0.001548 | 26      | 0.0069           |
| OTU_110   | eAT.MCP.1.mRNA        | -0.55544    | 0.003223 | 26      | 0.0119           |
| OTU_110   | eAT.adipocyte.size    | -0.62091    | 0.000926 | 25      | 0.005            |
