# Supplementary material for: Synbiotic-driven improvement of metabolic disturbances is associated with changes in the gut microbiome in diet-induced obese mice
Source: PubMed Central journal article supplement — Mol Metab. 2019 Feb 5;22:96–109. doi: 10.1016/j.molmet.2019.01.012 (PMC6437638; doi:10.1016/j.molmet.2019.01.012), 2019-02-05
Supplement: mmc6.pdf [file mmc6.pdf]

**Table S6b The correlation statistics between KEGG pathways and host metabolic parameters**

| Variable1                             | Variable2          | Correlation | P value  | Support | Corrected_pvalue |
|---------------------------------------|--------------------|-------------|----------|---------|------------------|
| Glycolysis_Gluconeogenesis            | Fasting.insulin    | 0.5783786   | 0.00384  | 23      | 0.0228           |
| Glycolysis_Gluconeogenesis            | HOMA.IR            | 0.5963727   | 0.002669 | 23      | 0.0191           |
| Glycolysis_Gluconeogenesis            | Serum.LBP          | 0.5315405   | 0.015868 | 20      | 0.051            |
| Glycolysis_Gluconeogenesis            | Cholesterol        | 0.5808429   | 0.005761 | 21      | 0.0278           |
| Glycolysis_Gluconeogenesis            | eAT.TNF.a.mRNA     | 0.5232202   | 0.003586 | 29      | 0.0224           |
| Glycolysis_Gluconeogenesis            | Liver.weight       | 0.5624527   | 0.001216 | 30      | 0.0131           |
| Carbohydrate_metabolism               | Weight.gain        | 0.5840169   | 0.000703 | 30      | 0.0131           |
| Carbohydrate_metabolism               | Cholesterol        | 0.6289606   | 0.002256 | 21      | 0.0188           |
| Carbohydrate_metabolism               | eAT.TNF.a.mRNA     | 0.5831843   | 0.000899 | 29      | 0.0131           |
| Carbohydrate_metabolism               | eAT.MCP.1.mRNA     | 0.5746806   | 0.001112 | 29      | 0.0131           |
| Carbohydrate_metabolism               | eAT.adipocyte.size | 0.5172121   | 0.009647 | 24      | 0.0377           |
| Carbohydrate_metabolism               | eAT.weight         | 0.5995466   | 0.000463 | 30      | 0.0131           |
| Lysine_biosynthesis                   | Cholesterol        | 0.6050326   | 0.003662 | 21      | 0.0224           |
| Lysine_biosynthesis                   | eAT.weight         | 0.5610459   | 0.001258 | 30      | 0.0131           |
| Monobactam_biosynthesis               | Cholesterol        | 0.5821644   | 0.005625 | 21      | 0.0278           |
| Monobactam_biosynthesis               | eAT.CD11c.mRNA     | 0.5545742   | 0.001796 | 29      | 0.017            |
| Monobactam_biosynthesis               | eAT.MCP.1.mRNA     | 0.5860465   | 0.000836 | 29      | 0.0131           |
| Monobactam_biosynthesis               | eAT.weight         | 0.6322338   | 0.000178 | 30      | 0.0131           |
| Ribosome                              | Cholesterol        | -0.555076   | 0.009003 | 21      | 0.036            |
| Oxidative_phosphorylation             | Cholesterol        | -0.538967   | 0.011699 | 21      | 0.0435           |
| RNA_polymerase                        | Weight.gain        | -0.502421   | 0.004664 | 30      | 0.0259           |
| RNA_polymerase                        | eAT.weight         | -0.510358   | 0.003958 | 30      | 0.0229           |
| Transcription_machinery               | eAT.weight         | -0.530069   | 0.002588 | 30      | 0.0191           |
| DNA_repair_and_recombination_proteins | Cholesterol        | -0.520696   | 0.015516 | 21      | 0.051            |
| DNA_repair_and_recombination_proteins | eAT.weight         | -0.501674   | 0.004736 | 30      | 0.0259           |
| Prokaryotic_Defense_System            | eAT.TNF.a.mRNA     | -0.534712   | 0.00589  | 25      | 0.0278           |
| Primary_bile_acid_biosynthesis        | eAT.CD11c.mRNA     | 0.5092775   | 0.001093 | 38      | 0.0131           |
| Primary_bile_acid_biosynthesis        | eAT.MCP.1.mRNA     | 0.5263872   | 0.000687 | 38      | 0.0131           |
| Cholesterol_metabolism                | Cholesterol        | 0.5199621   | 0.001153 | 36      | 0.0131           |
| Cholesterol_metabolism                | eAT.TNF.a.mRNA     | 0.5171818   | 0.000885 | 38      | 0.0131           |
| Cholesterol_metabolism                | eAT.MCP.1.mRNA     | 0.5211689   | 0.000794 | 38      | 0.0131           |
| Taurine_and_hypotaurine_metabolism    | Cholesterol        | 0.5328528   | 0.000821 | 36      | 0.0131           |
| Taurine_and_hypotaurine_metabolism    | eAT.TNF.a.mRNA     | 0.5371125   | 0.000507 | 38      | 0.0131           |
| Taurine_and_hypotaurine_metabolism    | eAT.MCP.1.mRNA     | 0.5356597   | 0.000529 | 38      | 0.0131           |
